# Supplementary material
Source: publisher figshare collection journal article supplement (https://frontiersin.figshare.com/ndownloader/files/35088307)
Supplement: Supplementary file [file 35088307]

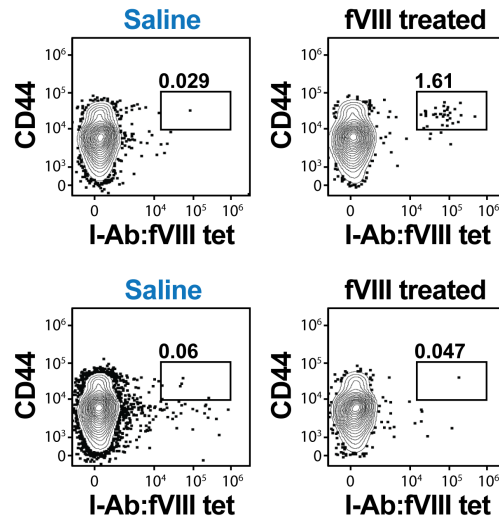

**Supplemental Figure 3. The MHC Class II (I-Ab:FVIII2210-2229) tetramer identifies FVIII experienced CD4 T cells.** Representative flow cytometric plots demonstrating the ability of the MHC Class II (I-Ab:FVIII2210-2229) tetramer to detect FVIII experienced CD4 T cells. Splenocytes from FVIII deficient mice immunized against FVIII or treated with saline were combined and split into 2 groups per condition. Samples were then stained with an MHC Class II (I-Ab:FVIII2210-2229) tetramer loaded with an immunodominant epitope within the C2 domain of FVIII or a non-specific CLIP tetramer, as well as CD44 to detect FVIII experienced CD4 T cells.
